RESEARCH ARTICLE

# *In vitro* additive interaction between ketoconazole and antimony against intramacrophage *Leishmania (Leishmania) amazonensis* amastigotes

Débora Cristina de Oliveira Nunes<sup>1,2</sup>, Luiz Borges Bispo-da-Silva<sup>3</sup>, Danielle Reis Napolitano<sup>2,3</sup>, Mônica Soares Costa<sup>1</sup>, Márcia Moura Nunes Rocha Figueira<sup>1</sup>, Renata Santos Rodrigues<sup>1,2</sup>, Veridiana de Melo Rodrigues<sup>1,2</sup>, Kelly Aparecida Geraldo Yoneyama<sup>1\*</sup>

**1** Instituto de Genética e Bioquímica, Universidade Federal de Uberlândia, Uberlândia, Minas Gerais, Brazil, **2** Instituto Nacional de Ciência e Tecnologia em Nano-Biofarmacêutica (N-Biofar), Belo Horizonte, Minas Gerais, Brazil, **3** Área de Ciências Fisiológicas, Instituto de Ciências Biomédicas, Universidade Federal de Uberlândia, Uberlândia, Minas Gerais, Brazil

\* [kelly.tudini@ufu.br](mailto:kelly.tudini@ufu.br)

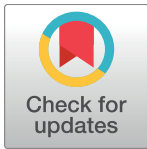

**OPEN ACCESS**

**Citation:** Nunes DCdO, Bispo-da-Silva LB, Napolitano DR, Costa MS, Figueira MMNR, Rodrigues RS, et al. (2017) *In vitro* additive interaction between ketoconazole and antimony against intramacrophage *Leishmania (Leishmania) amazonensis* amastigotes. PLoS ONE 12(6): e0180530. <https://doi.org/10.1371/journal.pone.0180530>

**Editor:** Luis Eduardo M Quintas, Universidade Federal do Rio de Janeiro, BRAZIL

**Received:** March 21, 2017

**Accepted:** June 16, 2017

**Published:** June 29, 2017

**Copyright:** © 2017 Nunes et al. This is an open access article distributed under the terms of the [Creative Commons Attribution License](https://creativecommons.org/licenses/by/4.0/), which permits unrestricted use, distribution, and reproduction in any medium, provided the original author and source are credited.

**Data Availability Statement:** All relevant data are within the paper.

**Funding:** This work was supported by the Fundação de Amparo à Pesquisa do Estado de Minas Gerais. Award Number: APQ-02731-08; Fundação de Amparo à Pesquisa do Estado de Minas Gerais. Award Number: APQ-00376-10; Conselho Nacional de Desenvolvimento Científico e Tecnológico. Award Number: 479000/2013-1. The

## Abstract

Leishmaniasis is a group of diseases caused by protozoa of *Leishmania* genus. The currently available treatments for this disease are expensive, present high toxicity and are associated to difficulties of healing and parasite resistance. Therefore, the development of strategies for leishmaniasis treatment is indispensable and includes reposition of existing drugs, as well as drug combination therapy. The aim of this study was to assess the nature of ketoconazole and antimony association on the cytotoxic effect against *Leishmania (Leishmania) amazonensis* amastigotes. The calculated mean sum of fractional 50% inhibitory concentration ( $\bar{x}\Sigma FIC_{50}$ ) was 2.54 and 1.43 for free and intracellular amastigotes, respectively, values that suggest an additive interaction between ketoconazole and antimony concerning to *Leishmania* toxicity only in the intramacrophage parasite form. Despite the clinical efficacy of ketoconazole-antimony combination has been shown in the literature, our study is the first to describe the nature of ketoconazole-antimony interaction against *L. (L.) amazonensis* amastigotes. Moreover, our results point out the need for future *in vivo* studies to confirm the nature of ketoconazole-antimony interaction and also to determine possible effective dosage regimens related to ketoconazole administration in association with the optimal lower dose of antimony.

## Introduction

Parasitic protozoan diseases are commonly found in the poorest countries of the world and constitute one of the most widely spread human health problem [1]. These diseases are still neglected and unfortunately have received little attention from the pharmaceutical industry

fundamental role in study design, data collection and analysis, decision to publish, or preparation of the manuscript.

**Competing interests:** The authors have declared that no competing interests exist.

and scientific funding agencies [2]. Despite several therapeutic options are available to treat different forms of leishmaniasis, the current chemotherapy of cutaneous leishmaniasis usually relies on antimony-based drugs. However, these drugs produce many side effects and their toxicity associated to the drug-resistant strains have limited therapeutic uses of antimony-based agents [3].

Nowadays, the repositioning of agents already used clinically for other purposes represents an important therapeutic strategy to treat leishmaniasis. In this way, azole compounds, known to inhibit fungal sterol biosynthesis, have been an option described in the literature [4]. Another therapeutic strategy is the combination of drugs with different mechanisms of action. This approach has many therapeutic advantages, such as: increased therapeutic efficacy; decreased toxicity due to reduction in the effective dose; reduced development of drug resistance; and selective synergism against parasite target versus host [3,5,6]. In this respect, the association of antimony-based agents with ketoconazole has been successfully used in human against old world leishmaniasis [7]; however, nothing is known about the pharmacological nature of this association, as well as of its efficacy on new world *Leishmania* species, such as *L. (L.) amazonensis*. Therefore, in the present study we aimed at investigating the *in vitro* antiparasitic efficacy and the pharmacological nature of antimony associated to ketoconazole against *L. (L.) amazonensis* amastigotes.

## Materials and methods

### Chemicals

Dimethylsulfoxide (DMSO), Giemsa stain modified solution, 4-(2-hydroxyethyl)-1-piperazineethanesulfonic acid (HEPES), ketoconazole, 3-(4,5-dimethylthiazol-2-yl)-2,5-diphenyl tetrazolium bromide (MTT), potassium antimonyl tartrate trihydrate, RPMI 1640 medium, sodium dodecyl sulphate (SDS), penicillin and streptomycin were purchased from Sigma Chemical Co. (St Louis, USA). Heat-inactivated fetal bovine serum (FBS) (Cultilab, Brazil), Schneider's insect medium (LGC Biotecnologia, Brazil). All other reagents were analytical grade or superior. Ketoconazole was dissolved in a 1 M stock of dimethyl sulfoxide (DMSO) and stored at -20°C. For experiments, new dilutions were prepared in culture medium to ensure that the DMSO concentration in culture medium did not exceed 0.1%.

### Animals

The experiments were performed using female BALB/c mice supplied by the animal facility of the Federal University of Uberlândia (CBEA/UFU). The animals were housed in a room at 25°C with 12 h light/dark cycles and were provided free access to water and standard chow *ad libitum*. All the protocols used were reviewed and approved by the Ethics Committee on Animal Use of the Federal University of Uberlândia (CEUA/UFU; process n° 36/2013).

### Parasites—Promastigote and free amastigote

*Leishmania (Leishmania) amazonensis* (IFLA/BR/67/PH8 strain) promastigotes were cultured in Schneider's insect medium, pH 7.0, supplemented with 10% FBS, penicillin (100 UI.mL<sup>-1</sup>) and streptomycin (100 µg.mL<sup>-1</sup>) at 23 ± 0.5°C. Promastigotes used in all experiments were isolated from the stationary growth phase.

Free amastigotes were obtained from footpad of BALB/c mice (6–8 weeks old) previously infected with promastigote forms (1 × 10<sup>7</sup> cells/footpad) for 5 to 6 weeks [8]. These parasites were cultured in complete Schneider's insect medium, at 32 ± 0.5°C, ensuring that these parasites remained as axenic amastigote forms [9], and used within two days.

## Murine macrophage culture

Murine macrophage cell line RAW264.7 was obtained from Rio de Janeiro Bank Cell and cultured in RPMI 1640 medium, supplemented with 5% FBS, penicillin ( $100 \text{ UI}\cdot\text{mL}^{-1}$ ), streptomycin ( $100 \mu\text{g}\cdot\text{mL}^{-1}$ ) in  $75\text{-cm}^2$  flasks. All cell cultures were done at  $37^\circ\text{C}$  in humidified air with 5%  $\text{CO}_2$ .

## Viability—Macrophage and free amastigote assays

Viability assays in presence of drugs (antimony and/or ketoconazole) were carried on free amastigote forms and murine macrophages cell line RAW264.7, by colorimetric method based on mitochondrial oxidation of MTT reagent ( $5 \text{ mg}\cdot\text{mL}^{-1}$ ,  $100 \mu\text{g}/\text{well}$ ) [10]. Free amastigotes ( $5\times 10^5$  cells/well) and macrophages ( $2\times 10^5$  cells/well) were incubated with its respective medium alone (control) or containing ketoconazole ( $10^{-10}$  to  $10^{-3}$  M) or antimony ( $10^{-12}$  to  $10^{-3}$  M) for 48 hours. The 50% inhibitory concentration ( $\text{IC}_{50}$ ) of drugs on cell viability were then determined in each individual experiment considering control values as 100% of viability. This assay was carried out in triplicate and three independent experiments were performed. Cytotoxicity in RAW macrophages and activity against free amastigotes for ketoconazole and antimony were compared using the selectivity index (SI; ratio:  $\text{IC}_{50}$  RAW macrophage/  $\text{IC}_{50}$  parasite).

## Infectivity—Intracellular amastigote assay

Macrophages ( $4\times 10^5$ ) were placed in 24-well plates containing 13-mm diameter glass coverslips. Then, macrophages were infected with *L. (L.) amazonensis* free amastigotes isolated immediately before their use at 2:1 ratio (free amastigotes/macrophage). After 1h30, plates were washed with PBS to remove non-internalized amastigotes and RPMI medium alone (control) or containing drugs ( $13.125$  to  $420 \mu\text{M}$  for ketoconazole and  $0.156$  to  $5 \mu\text{M}$  for antimony, both double serial dilutions) were added. Experiments were conducted at  $37^\circ\text{C}$  in a 5%  $\text{CO}_2$  humidified incubator for 48 h. Cells on coverslips were fixed and stained with Giemsa stain modified solution for evaluation of the infection index. Infectivity index was defined as the average number of intracellular amastigotes in infected macrophages multiplied by percentage of infected macrophage; 100 cells per coverslip were blind counted. The  $\text{IC}_{50}$  values of drugs on the infectivity were then determined in each individual experiment considering control values as 100% of infectivity. This assay was carried out in triplicate and two independent experiments were performed.

## Isobologram

The interaction between ketoconazole and antimony was *in vitro* evaluated by using the modified isobologram method according to [5, 11], with modification. Briefly, to construct an isobologram and determine the type of interaction between drugs, the prerequisite is to know the potency and a form of dose-effect curve of each drug alone. The  $\text{IC}_{50}$  values obtained in the experiments described in ‘Viability—macrophage and free amastigote assays’ and ‘Infectivity—Intracellular amastigote assay’ subsections were used to determine the maximum concentration of each drug in the combination assay ensuring that  $\text{IC}_{50}$  was in the midpoint of curves, except for the intracellular amastigote assay; in this case, the  $\text{IC}_{50}$  falls on the third point (from the maximum concentration used), that was not the midpoint, since highest concentrations of both drugs necessary to complete the curves were toxic for macrophages. The highest concentration of the solutions were prepared in proportions of 5:0, 4:1, 3:2, 2:3, 1:4 and 0:5 of ketoconazole and antimony, which were serially diluted to the ninth or sixth well of microplate for

free amastigote or intracellular amastigote assays, respectively; this assay was carried out in duplicate (infectivity assay) or triplicate (viability assay) and two independent experiments were performed. Assays of combinations in each ratio allowed getting concentration-effect curves and therefore the  $IC_{50}$  for each combination ratio in relation to ketoconazole and antimony. Then, fractional inhibitory concentrations (FICs) at the  $IC_{50}$  level ( $FIC_{50}$ ) were calculated for both drugs, as follows:  $FIC_{50} = IC_{50} \text{ drugs in combination} / IC_{50} \text{ drug alone}$ .  $FIC_{50}$ s of each drug ratio (i.e. 4:1, 3:2, 2:3 and 1:4) were used to build isobolograms. It is important to mention that isobolograms constructed using FIC values are also known as normalized isobolograms [6]. Moreover, the sum of the  $FIC_{50}$ s for each ratio, also referred as combination index [6], was determined ( $\Sigma FIC_{50}s = FIC_{50} \text{ ketoconazole} + FIC_{50} \text{ antimony}$ ), and an overall mean of  $\Sigma FIC_{50}s$  ( $\bar{x}\Sigma FIC_{50}$ ) was calculated. Finally, the average of the  $\Sigma FIC_{50}$  was used to classify the nature of interaction: 'Synergy' defined as mean  $\Sigma FIC \leq 0.5$ ; 'Indifference/Additive' as mean  $\Sigma FIC > 0.5$  and  $\leq 2$ ; and 'Antagonism' as mean  $\Sigma FIC > 2$  [12].

## Statistical analysis

In the experiments, the 50% viability/infectivity inhibition values ( $IC_{50}$ ) were estimated by fitting the concentration-response data to the four parameter logistic equation through nonlinear regression analysis, according to the following equation: as follows:  $Y = \text{Bottom} + (\text{Top} - \text{Bottom}) / (1 + 10^{((\text{LogEC}_{50} - X) * \text{HillSlope}))}$  [13]. Moreover,  $IC_{50}$ ,  $FIC_{50}$ ,  $\Sigma FIC_{50}s$  and  $\bar{x}\Sigma FIC_{50}$  were calculated for each individual experiment using GraphPad Prism 5.0 (GraphPad Software Inc., San Diego, USA), and results were expressed as the mean and standard error of at least two independent experiments.

## Results

### In vitro susceptibility of amastigotes and macrophages to individual drugs

Both drugs caused a concentration-dependent inhibition on amastigote viability after 48 hours of incubation presenting  $IC_{50}$  values of 105.5  $\mu\text{M}$  for ketoconazole and 2.5  $\mu\text{M}$  for antimony (Fig 1A). Concentration-dependent inhibition on macrophages cell line RAW viability was also observed (Fig 1B). Ketoconazole was much less toxic to macrophage than antimony (Fig 1B;  $IC_{50} = 436.5$  vs. 7.3  $\mu\text{M}$ ; ketoconazole vs. antimony) presenting selectivity index of approximately 4.1 and 2.9 for ketoconazole and antimony, respectively. Both drugs also inhibited intracellular amastigotes in a concentration-dependent way, presenting  $IC_{50}$  of 75 and 1.5  $\mu\text{M}$  for ketoconazole and antimony, respectively (Fig 1C).

### Effect of ketoconazole and antimony combination on amastigotes and isobologram

This experimental approach allowed the determination of  $FIC_{50}$  values for each combination. Overall mean of  $\Sigma FIC_{50}$  for free amastigotes assay ranged from 2.01 to 2.99 and the  $\bar{x}\Sigma FIC_{50}$  was  $2.54 \pm 1.7$ . For intracellular amastigotes, the overall mean of  $\Sigma FIC_{50}$  ranged from 1.07 to 1.60 and the  $\bar{x}\Sigma FIC_{50}$  was  $1.43 \pm 0.38$ . The  $IC_{50}$ ,  $FIC_{50}$ ,  $\Sigma FIC_{50}$  and  $\bar{x}\Sigma FIC_{50}$  values are given in Table 1 and the corresponding isobolograms are shown in Fig 2A and 2B. The sigmoidal concentration-effect curves for each combination are present in Fig 2C and 2D.

## Discussion

Ketoconazole- and antimony-induced *Leishmania* toxicity appears to be related to the inhibitory effects of these drugs on different parasite metabolic pathways [4, 14]. Therefore, in the

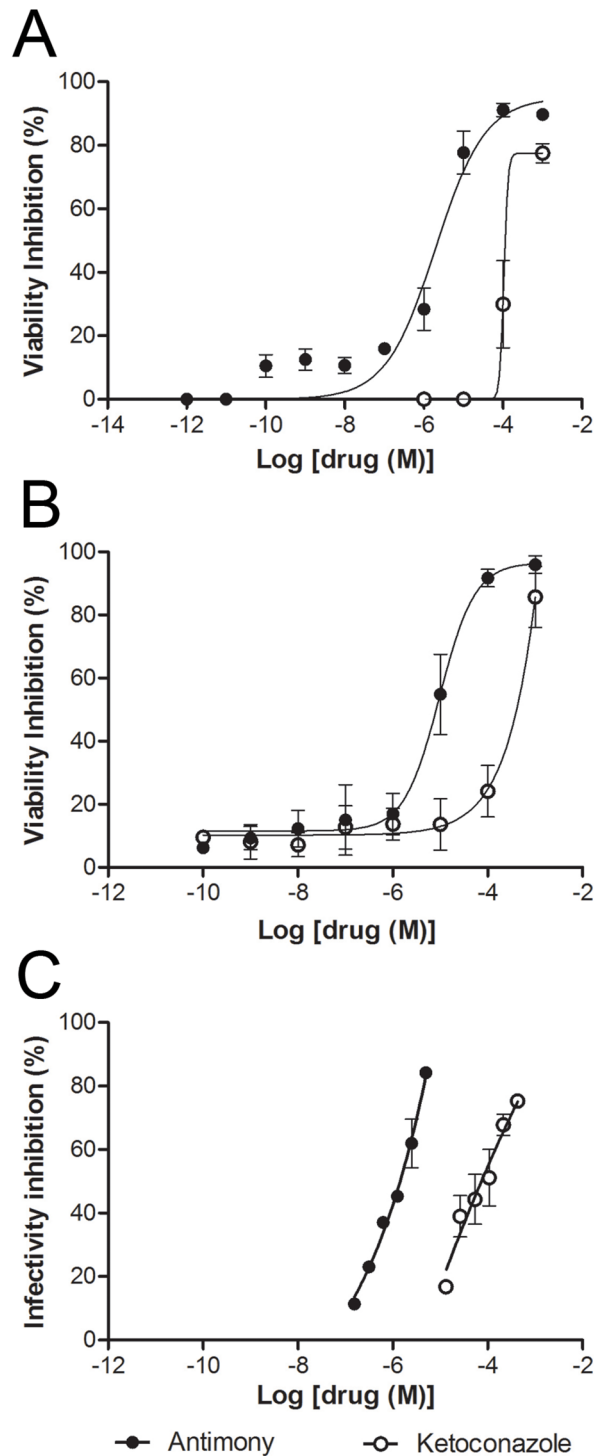

**Fig 1. Cytotoxic effects of isolated drugs (ketoconazole and antimony) on free amastigotes, murine macrophages cell line RAW264.7 and intracellular amastigotes.** Concentration-effect curves to ketoconazole (white points) and antimony (black points) against *L. (L.) amazonensis* free amastigotes (A), murine macrophages (B) or intracellular amastigotes (C). Data represent mean  $\pm$  SEM of two to three independent experiments performed in triplicate.

<https://doi.org/10.1371/journal.pone.0180530.g001>

**Table 1. IC<sub>50</sub>, FIC<sub>50</sub> and ΣFIC<sub>50</sub> of antimony-ketoconazole combination against *L. (L.) amazonensis* free and intracellular amastigotes.**

| Assay                     | Combination Rate |              | Combined drugs   |                |                   |              |             | Σ FIC <sub>50</sub> | x̄ΣFIC <sub>50</sub> |
|---------------------------|------------------|--------------|------------------|----------------|-------------------|--------------|-------------|---------------------|----------------------|
|                           |                  |              | IC <sub>50</sub> |                | FIC <sub>50</sub> |              |             |                     |                      |
|                           | Antimony         | Ketoconazole | Antimony         | Ketoconazole   | Antimony          | Ketoconazole |             |                     |                      |
| Free amastigotes          | 0                | 5            | ---              | 254.80 ± 60.20 | ---               | ---          | ---         | 2.54±1.23           |                      |
|                           | 1                | 4            | 0.97 ± 0.03      | 432.75 ± 94.05 | 0.61 ± 0.31       | 1.89 ± 0.81  | 2.50 ± 1.13 |                     |                      |
|                           | 2                | 3            | 2.29 ± 0.02      | 290.15 ± 2.95  | 1.46 ± 0.78       | 1.20 ± 0.27  | 2.66 ± 1.05 |                     |                      |
|                           | 3                | 2            | 3.13 ± 0.64      | 175.40 ± 36.00 | 2.23 ± 1.50       | 0.76 ± 0.32  | 2.99 ± 1.82 |                     |                      |
|                           | 4                | 1            | 2.87 ± 0.20      | 60.38 ± 4.33   | 1.77 ± 0.87       | 0.24 ± 0.04  | 2.01 ± 0.91 |                     |                      |
|                           | 5                | 0            | 2.22 ± 1.20      | ---            | ---               | ---          | ---         |                     |                      |
| Intracellular amastigotes | 0                | 5            | ---              | 89.93 ± 14.77  | ---               | ---          | ---         | 1.42±0.27           |                      |
|                           | 1                | 4            | 0.37 ± 0.07      | 51.73 ± 21.54  | 0.52 ± 0.31       | 0.55 ± 0.14  | 1.07 ± 0.16 |                     |                      |
|                           | 2                | 3            | 0.88 ± 0.50      | 62.04 ± 47.59  | 0.84 ± 0.21       | 0.62 ± 0.42  | 1.46 ± 0.21 |                     |                      |
|                           | 3                | 2            | 0.98 ± 0.27      | 29.66 ± 17.64  | 1.27 ± 0.69       | 0.30 ± 0.14  | 1.57 ± 0.55 |                     |                      |
|                           | 4                | 1            | 1.20 ± 0.44      | 17.15 ± 10.39  | 1.43 ± 0.67       | 0.17 ± 0.08  | 1.60 ± 0.59 |                     |                      |
|                           | 5                | 0            | 1.27 ± 0.91      | ---            | ---               | ---          | ---         |                     |                      |

Data expressed as mean ± SEM.

<https://doi.org/10.1371/journal.pone.0180530.t001>

present study we tested the hypothesis that the combination of ketoconazole with antimony could improve the antileishmanial effect of these agents. It has been shown that Sb<sup>5+</sup> should be reduced by the host cells to Sb<sup>3+</sup>, the active form against parasites [15, 16]. Thus, since both intramacrophage or free parasites were analyzed, and to avoid biases due to variability in macrophage drug conversion, antimony tartrate (Sb<sup>3+</sup>) was used instead meglumine antimoniate (Sb<sup>5+</sup>). Despite ketoconazole was less potent than antimony in inducing *L. (L.) amazonensis* free (*ca.* 40 times) and intracellular (*ca.* 50 times) amastigotes death *in vitro*, ketoconazole was much less toxic to macrophages than antimony. These data strongly suggest that this azole compound may be used against parasite-infected macrophages ensuring safety and efficacy.

Previous clinical trials studies showed the efficacy of ketoconazole alone in several *Leishmania* species around the world [17, 18, 19, 20], and the literature also pointed out that ketoconazole efficacy is comparable to those of antimonial based drugs [21, 22, 23]. However, to our knowledge, only one study focused on the combined therapy of ketoconazole and antimony. In that study it was observed that sodium stibogluconate (SSG) combined with ketoconazole was more effective than SSG alone to treat human cutaneous leishmaniotic lesions [7]. It is important to mention that the clinical study cited above was conducted in an Asian country where the common etiologic agents for cutaneous leishmaniasis are *L. major*, *L. tropica*, and *L. aethiopica*; however, in our study we focused on *L. (L.) amazonensis*, one of the typical species related to the disease in the America continent [1].

FIC is a widespread index used to study drug interactions and many critical values have been arbitrarily used to define the nature of drug combination [6, 24, 25, 26, 27]. The additivity range of 0.5 to 4.0 has been recommended by some expertise in the field [26] and employed in several studies concerning the interactions of antileishmanial drugs [11, 28, 29, 30]. However, based on the absence of *in vitro-in vivo* correlation studies, concerns about the validity of this arbitrarily chosen FIC were raised, and a more symmetrical additivity range of 0.5 to 2.0 was suggested [12]. In the present study, two different experimental conditions were performed, including the amastigote-macrophage model, the gold standard assay for determining the intrinsic drug susceptibility of intracellular amastigotes [31]. According to the more symmetrical additivity range mentioned above, the x̄ΣFIC (1.42) observed in our study indicate an



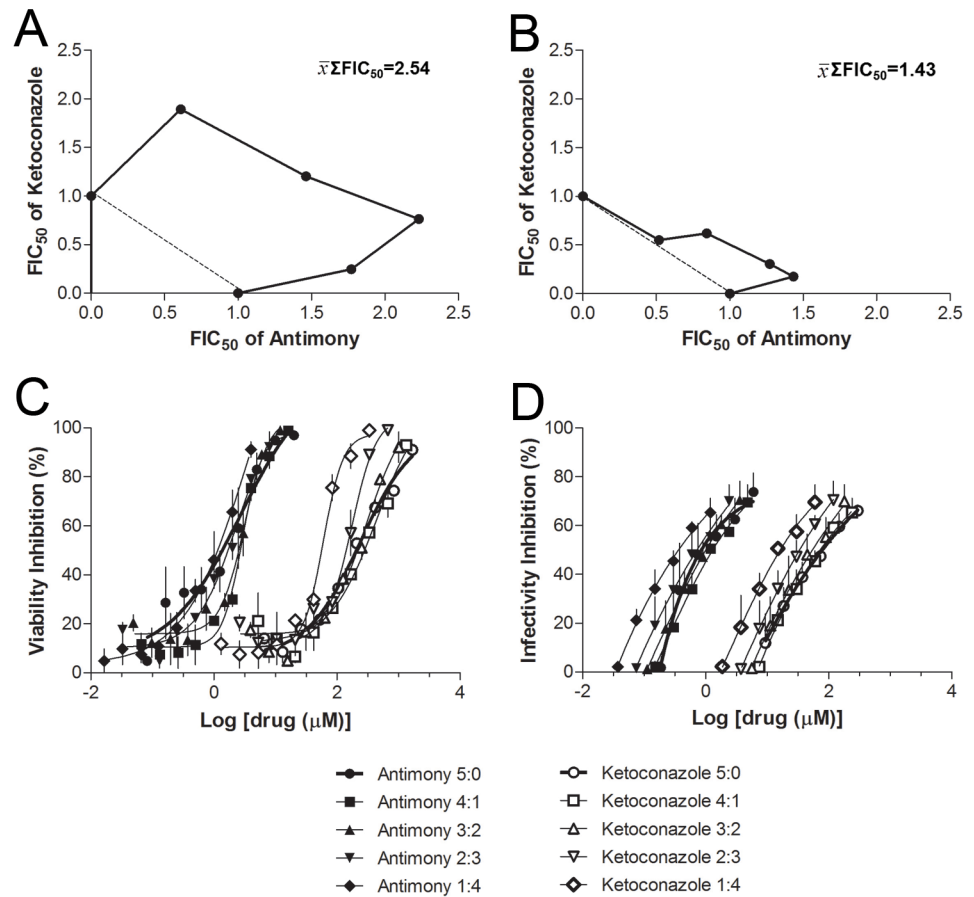

**Fig 2. Ketoconazole and antimony combination on *L. (L.) amazonensis* amastigotes.** Isobologram representing *in vitro* ketoconazole-antimony interaction against *L. (L.) amazonensis* free (A) or intracellular (B) amastigotes by a fixed-ratio method based on the IC50. Dashed line represents an ideal theoretical line for the additive effect; the  $\bar{\Sigma}FIC_{50}$  for all interactions tested is also shown. Concentration-effect curves concerning the inhibition of *L. (L.) amazonensis* free (C) and intracellular (D) amastigotes by different combinations of antimony (black points) and ketoconazole (white points). Data represent mean  $\pm$  SEM of two independent experiments performed in triplicate.

<https://doi.org/10.1371/journal.pone.0180530.g002>

additive nature to ketoconazole-antimony combination against intramacrophage amastigote. Moreover, the ketoconazole-antimony combination resulted in  $\Sigma FIC_{min}$  and  $\Sigma FIC_{max}$  of 1.07 and 1.60, respectively, values that are within the range observed in self-drug additive combination studies [12]. On the other hand, the  $\bar{\Sigma}FIC$  (2.54) for free amastigotes suggests an antagonistic interaction between ketoconazole and antimony. Despite we have no explanation for this discrepancy these results suggest altogether that the intracellular environment alter the nature of the interaction between ketoconazole and antimony against *L. (L.) amazonensis*. It is noteworthy that although experiments carried out with promastigotes or axenic amastigotes are easier to perform, to use intracellular amastigotes is clinically more relevant once this parasite form bears a closer similarity to the *in vivo* situation and correlate better with the treatment outcome [32, 33]. The use of lower doses of antimony associated with ketoconazole has the advantage of reducing side effects and limits the development of resistant strains, an emerging worldwide therapeutic problem. Therefore, considering the toxicity of antimony, its indifferent interaction with ketoconazole against intramacrophage amastigote could be useful and should be confirmed *in vivo*.

Moreover, cutaneous lesion may become susceptible to colonization with a number of microorganisms, such as pathogenic or opportunistic fungi that could cause secondary infections [34]. Hence, beyond the suggestion (based on our *in vitro* data) that direct effects of the ketoconazole in combination with antimony on *Leishmania* death could occur *in vivo*, ketoconazole could also improve the leishmaniotic lesion due to its action on fungi.

It is important to mention that we analyzed the interaction just in relation to IC50 level, since we obtained inhibition percentages nearby but less than 100% for some combination within the dilution range used; this fact preclude the determination of all the FIC90 necessary for the data analysis. In attempt to reach 100% of inhibition we increased the ketoconazole concentration, however, in this condition the drug precipitated. It is important to mention that analyzing data using only IC50 level do not invalidate our results and interpretations, since the evaluation of FIC at IC90 levels serve only as rebuttal [35, 36].

In conclusion, although the clinical efficacy of ketoconazole-antimony combination has been shown in the literature, our study is the first to describe the nature of ketoconazole-antimony interaction against *L. (L.) amazonensis* both in free and intracellular amastigotes. The additive interaction of ketoconazole-antimony combination in the intramacrophage parasite form points out that future *in vivo* experiment should be conducted to confirm this interaction and also to determine possible effective dosage regimens related to ketoconazole administration in association with the optimal lower dose of antimony.

## Acknowledgments

We thank Prof. Fábio de Oliveira (Laboratório de Biologia Molecular e Celular—ICBIM/UFU) for gently gift macrophage cell line and providing laboratory facilities.

## Author Contributions

**Conceptualization:** Débora Cristina de Oliveira Nunes, Luiz Borges Bispo-da-Silva, Kelly Aparecida Geraldo Yoneyama.

**Data curation:** Débora Cristina de Oliveira Nunes.

**Formal analysis:** Débora Cristina de Oliveira Nunes, Luiz Borges Bispo-da-Silva.

**Funding acquisition:** Renata Santos Rodrigues, Veridiana de Melo Rodrigues, Kelly Aparecida Geraldo Yoneyama.

**Investigation:** Débora Cristina de Oliveira Nunes, Danielle Reis Napolitano, Mônica Soares Costa, Márcia Moura Nunes Rocha Figueira.

**Methodology:** Débora Cristina de Oliveira Nunes, Luiz Borges Bispo-da-Silva, Danielle Reis Napolitano, Kelly Aparecida Geraldo Yoneyama.

**Project administration:** Kelly Aparecida Geraldo Yoneyama.

**Resources:** Renata Santos Rodrigues, Veridiana de Melo Rodrigues, Kelly Aparecida Geraldo Yoneyama.

**Validation:** Débora Cristina de Oliveira Nunes, Danielle Reis Napolitano, Mônica Soares Costa, Márcia Moura Nunes Rocha Figueira.

**Writing – original draft:** Débora Cristina de Oliveira Nunes, Luiz Borges Bispo-da-Silva, Kelly Aparecida Geraldo Yoneyama.

**Writing – review & editing:** Débora Cristina de Oliveira Nunes, Luiz Borges Bispo-da-Silva, Danielle Reis Napolitano, Mônica Soares Costa, Márcia Moura Nunes Rocha Figueira,



Renata Santos Rodrigues, Veridiana de Melo Rodrigues, Kelly Aparecida Geraldo Yoneyama.

## References

1. Elmahallawy EK, Martínez AS, Rodríguez-Granger J, Hoyos-Mallecot Y, Agil A, Mari JMN et al. Diagnosis of leishmaniasis. *J Infect Dev Ctries*. 2014; 8, 8: 961–972. <https://doi.org/10.3855/jidc.4310> PMID: 25116660
2. Chaudhary K, Ross D. Protozoan genomics for drug discovery. *Nat Biotechnol*. 2005; 23: 1089–1091. <https://doi.org/10.1038/nbt0905-1089> PMID: 16151400
3. Haldar AK, Sen P, Roy S. Use of antimony in the treatment of leishmaniasis: current status and future directions. *Mol Biol Int*. 2011; 2011: 1–23.
4. Lepesheva GI, Waterman MR. Sterol 14 $\alpha$ -demethylase (CYP51) as a therapeutic target for human Trypanosomiasis and Leishmaniasis. *Curr Top Med Chem*. 2011; 11: 2060–2071. PMID: 21619513
5. Fivelman QL, Adagu IS, Warhurst DC. Modified fixed-ratio isobologram method for studying in vitro interactions between Atovaquone and Proguanil or Dihydroartemisinin against drug-resistant strains of *Plasmodium falciparum*. *Antimicrob Agents Chemother*. 2004; 48, 11: 4097–4102. <https://doi.org/10.1128/AAC.48.11.4097-4102.2004> PMID: 15504827
6. Chou T. Theoretical basis, experimental design, and computerized simulation of synergism and antagonism in drug combination studies. *Pharmacol Rev*. 2006; 58: 621–681. <https://doi.org/10.1124/pr.58.3.10> PMID: 16968952
7. El-Sayed M, Anwar AE. Intralesional sodium stibogluconate alone or its combination with either intramuscular sodium stibogluconate or oral ketoconazole in the treatment of localized cutaneous leishmaniasis: a comparative study. *J Eur Acad Dermatol Venereol*. 2010; 24: 335–340. <https://doi.org/10.1111/j.1468-3083.2009.03417.x> PMID: 19744259
8. Nunes DCO, Figueira MNRF, Lopes DS, de Souza DLN, Izidoro LF, Ferro EA, et al. BnSP-7 toxin, a basic phospholipase A<sub>2</sub> from *Bothrops pauloensis* snake venom, interferes with proliferation, ultrastructure and infectivity of *Leishmania (Leishmania) amazonensis*. *Parasitol*. 2013; 140, 7: 844–854.
9. Gupta N, Goyal N, Rastogi AK. *In vitro* cultivation and characterization of axenic amastigotes of *Leishmania*. *Trends Parasitol*. 2001; 17, 3: 150–153. PMID: 11286801
10. Mosmann TJ. Rapid colorimetric assay for cellular growth and survival: application to proliferation and cytotoxicity assays. *Immunol Methods*. 1983; 65: 55–63.
11. Mesquita JT, Tempone AG, Reimão JQ. Combination therapy with Nitazoxanide and Amphotericin B, Glucantime®, Miltefosine and Sitamaquine against *Leishmania (Leishmania) infantum* intracellular amastigotes. *Acta Trop*. 2014; 130: 112–116. <https://doi.org/10.1016/j.actatropica.2013.11.003> PMID: 24239532
12. Meletiadiis J, Pournaras S, Roilides E, Walsh TJ. Defining fractional inhibitory concentration index cut-offs for additive interactions based on self-drug additive combinations, Monte Carlo simulation analysis, and *in vitro-in vivo* correlation data for antifungal drug combinations against *Aspergillus fumigates*. *Antimicrob A Chemoter*. 2010; 54 (2): 602–609.
13. Zhang G, Cvijic ME. Screening and characterization of G-protein-coupled receptor ligands for drug discovery. In: Seethala R, Zhang. *Handbook of drug screening*. New York, USA: Informa Healthcare; 2009, chapter 6, pp. 142.
14. Souza W, Rodrigues JCF. Sterol biosynthesis pathway as target for anti-trypanosomatid drugs. *Interdiscip Perspect Infect Dis*. 2009; 2009: 1–19.
15. Goodwin LG, Page JE. A study of the excretion of organic antimonials using a polarographic procedure. *Biochem J*. 1943; 37, 198–209. PMID: 16747617
16. Hansen C, Hansen EW, Hansen HR, Gammelgaard B, Stürup S. Reduction of Sb(V) in a human macrophage cell line measured by HPLC-ICP-MS. *Biol Trace Elem Res*. 2011; 144: 234–243. <https://doi.org/10.1007/s12011-011-9079-9> PMID: 21618006
17. Urcuyo FG, Zaias N. Oral ketoconazole in the treatment of leishmaniasis. *Pharmacol Ther*. 1982; 21: 414–416.
18. Jolliffe DS. Cutaneous leishmaniasis from Belize—treatment with ketoconazole. *Clin Exp Dermatol*. 1986; 11: 62–68. PMID: 3708895
19. Alsaleh QA, Dvorak R, Nanda A. Ketoconazole in the treatment of cutaneous leishmaniasis in Kuwait. *Int J Dermatol*. 1995; 34, 7: 495–497. PMID: 7591417
20. Boecken G, Sunderkotter C, Bogdan C, Weitzel T, Fischer M, Müller A, et al. Diagnosis and therapy of cutaneous and mucocutaneous Leishmaniasis in Germany. *J Dtsch Dermatol Ges*. 2011; 9, 8: 1–51.

21. Saenz RE, Paz H, Berman JD. Efficacy of ketoconazole against *Leishmania braziliensis panamensis* cutaneous leishmaniasis. *Am J Med.* 1990; 89: 147–155. PMID: [2166429](#)
22. Navin TR, Arana BA, Arana FE, Berman JD, Chajón JF. Placebo-controlled clinical trial of sodium stibogluconate (Pentostam) versus ketoconazole for treating cutaneous leishmaniasis in Guatemala. *J Infect Dis.* 1992; 165: 528–534. PMID: [1311351](#)
23. Salmanpour R, Handjani F, Nouhpisheh MK. Comparative study of the efficacy of oral ketoconazole with intra-lesional meglumine antimoniate (Glucantime) for the treatment of cutaneous leishmaniasis. *J Dermatolog Treat.* 2001; 12: 159–162. <https://doi.org/10.1080/09546630152607899> PMID: [12243707](#)
24. Berenbaum MC. A method for testing for synergy with any number of agents. *J Infect Dis.* 1978; 137 (2): 122–130.
25. Hall MJ, Middleton RF, Westmacott D. The fractional inhibitory concentration (FIC) index as a measure of synergy. *J Antimicrob Chemother.* 1983; 11:427–433. PMID: [6874629](#)
26. Dorsthrst DTA, Verweij PE, Meis JFGM, Punt NC, Mouton JW. Comparison of fractional inhibitory concentration index with response surface modeling for characterization of in vitro interaction of antifungals against itraconazole-susceptible and resistant *Aspergillus fumigates* isolates. *Antimicrob A Chemoter.* 2002; 46 (2): 702–707.
27. Odds FC. Synergy, antagonism, and what the chequerboard puts between them. *J Antimicrob Chemother.* 2003; 52: 1. <https://doi.org/10.1093/jac/dkg301> PMID: [12805255](#)
28. Seifert K, Munday J, Syeda T, Croft SL. *In vitro* interactions between sitamaquine and amphotericin B, sodium stibogluconate, miltefosine paramomycin and pentamidine against *Leishmania donovani*. *J Antimicrob Chemother.* 2011; 66: 850–854. <https://doi.org/10.1093/jac/dkq542> PMID: [21393188](#)
29. Shakya N, Sane SA, Vishwakarma P, Bajpai P, Gupta S. Improved treatment of visceral leishmaniasis (kala-azar) by using combinatios of ketoconazole, miltefosine with an immunomodulator—Pricoliv. *Acta Trop.* 2011; 119: 188–193. <https://doi.org/10.1016/j.actatropica.2011.05.017> PMID: [21679679](#)
30. Morais-Teixeira E, Gallupo MK, Rodrigues LF, Romanha AJ, Rabello A. *In vitro* interaction between paramomycin sulphate and four drugs with leishmanicidal activity against three New World *Leishmania* species. *J Antimicrob Chemother.* 2014; 69: 150–154. <https://doi.org/10.1093/jac/dkt318> PMID: [23970484](#)
31. Maes L, Cos P, Croft S. The relevance of susceptibility tests, breakpoints and markers. In: Ponte-Sucre A, Diaz E, Padrón-Nieves M, editors. *Drug resistance in Leishmania parasites*. Vienna, Austria: Springer; 2013. pp. 407–429.
32. Callahan HI, Portal AC, Devereaux R, Grogl M. An axenic amastigote system for drug screening. *Antim A Chemoter.* 1997; 41 (4): 818–822.
33. Le Bras J, Secor WE. Susceptibility test methods: parasites. In: Versalovic J, Karroll KC, Funke G, Jorgensen JH, Landry ML, Warnock DW, editors. *Manual of clinical microbiology*. Washington, USA: ASM Press; 2011. pp.2113–2117.
34. Fontes CO, Carvalho MAR, Nicoli JR, Hamdan JS, Mayrink W, Genaro O, et al. Identification and antimicrobial susceptibility of micro-organisms recovered from cutaneous lesions of human American tegumentar leishmaniasis in Minas Gerais, Brazil. *J Med Microbiol.* 2005; 54: 1071–1076. <https://doi.org/10.1099/jmm.0.46070-0> PMID: [16192439](#)
35. Pandharkar T, Zhu X, Mathur R, Jiang J, Schmittgen TD, Shaha C, Werbovets KA. Studies on the antileishmanial mechanism of action of the Arylimidamine DB766: azole interactions and role of CYP5122A1. *Antimicrob Agents Chemother.* 2014; 58, 8: 4682–4689. <https://doi.org/10.1128/AAC.02405-14> PMID: [24890590](#)
36. Trinconi CT, Reimão JQ, Yokoyama-Yasunaka JKU, Miguel DC, Uliana SRB. Combination therapy with Tamoxifen and Amphotericin B in experimental cutaneous leishmaniasis. *Antimicrob Agents Chemother.* 2014; 58, 5: 2608–2613. <https://doi.org/10.1128/AAC.01315-13> PMID: [24550333](#)
